# Supplementary material for: A Phosphoinositide-Binding Protein Acts in the Trafficking Pathway of Hemoglobin in the Malaria Parasite Plasmodium falciparum
Source: PubMed Central journal article supplement (PMC8764524; doi:10.1128/mbio.03239-21), 2022-01-18

Fig. S3

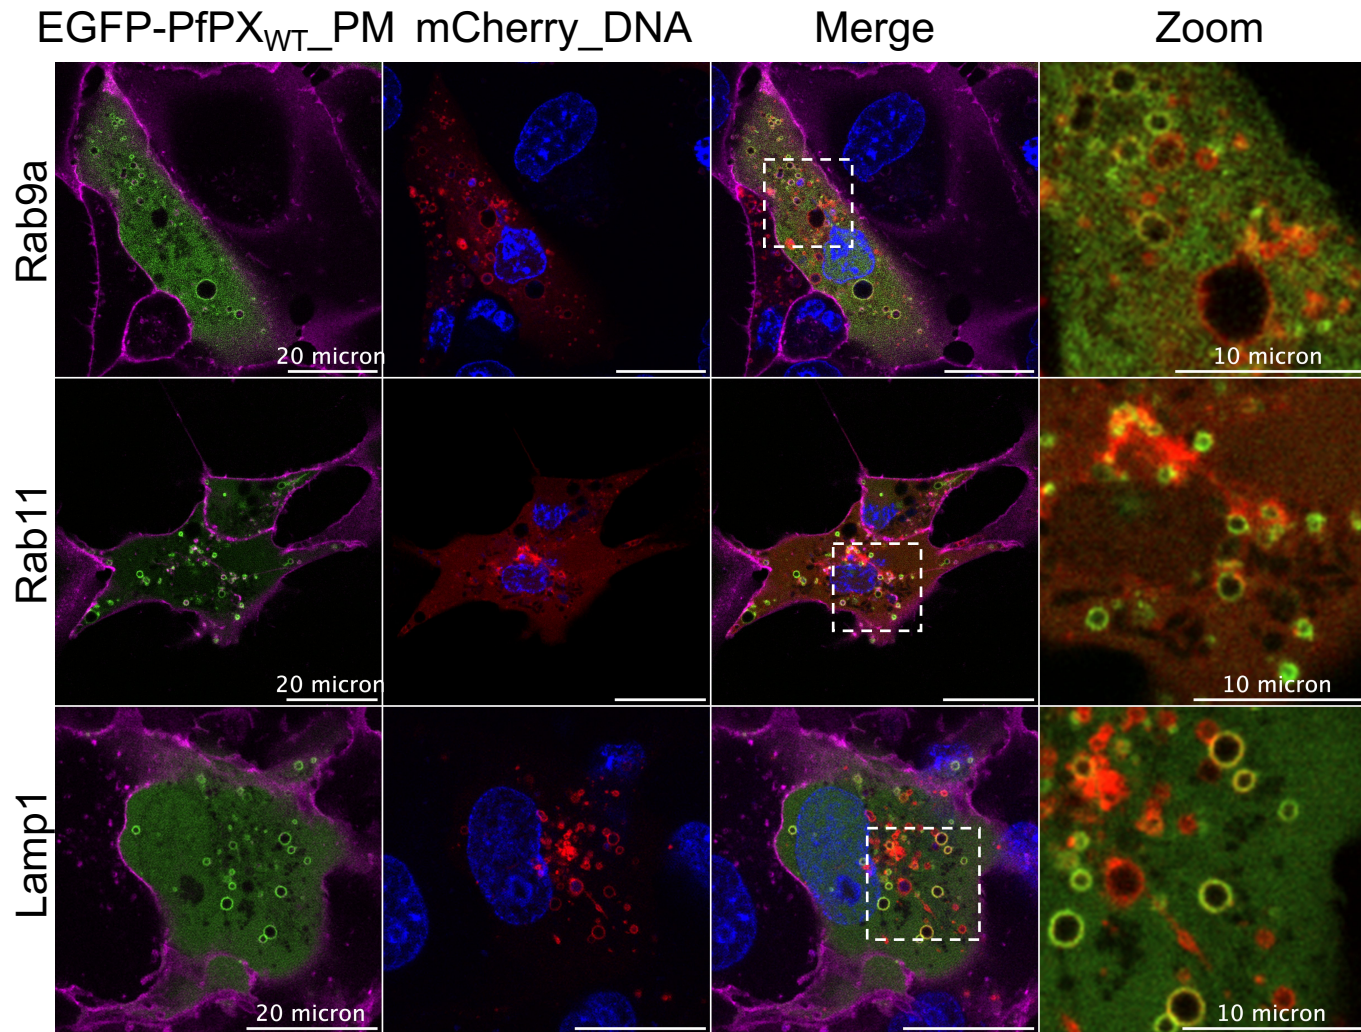

Supplement: mbio.03239-21-sf003.pdf [file mbio.03239-21-sf003.pdf]
