# Supplementary material for: A Phosphoinositide-Binding Protein Acts in the Trafficking Pathway of Hemoglobin in the Malaria Parasite Plasmodium falciparum
Source: PubMed Central journal article supplement (PMC8764524; doi:10.1128/mbio.03239-21), 2022-01-18
Supplement: mbio.03239-21-sf006.pdf [file mbio.03239-21-sf006.pdf]

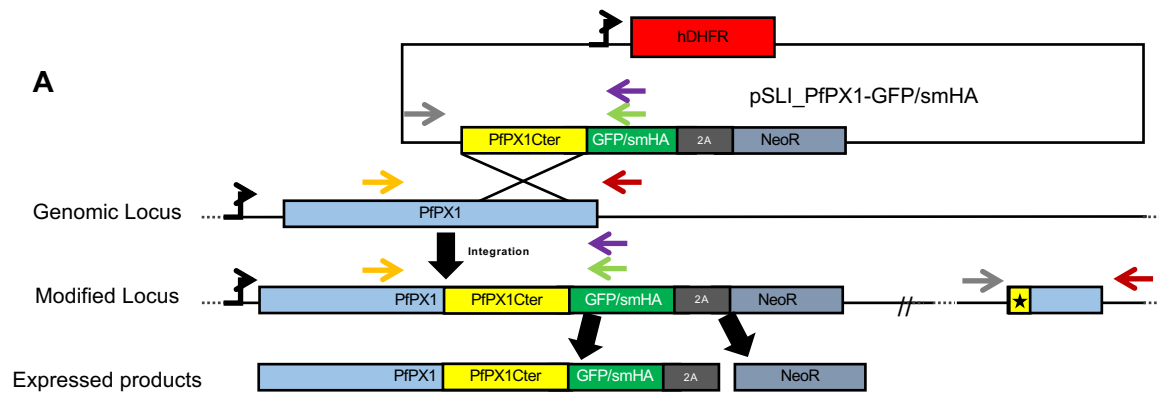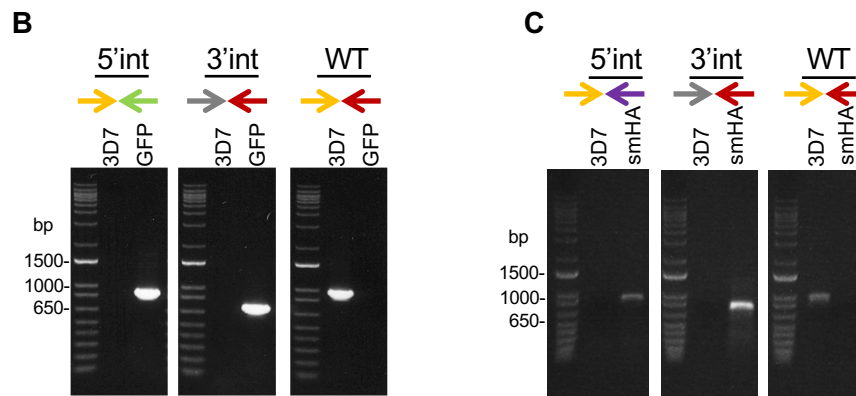

Expected sizes:  
 5': 926pb  
 3': 727pb  
 WT: 989pb

Fig. S6, Related to Fig. 4 and S7
