# Supplementary material for: A Phosphoinositide-Binding Protein Acts in the Trafficking Pathway of Hemoglobin in the Malaria Parasite Plasmodium falciparum
Source: PubMed Central journal article supplement (PMC8764524; doi:10.1128/mbio.03239-21), 2022-01-18
Supplement: mbio.03239-21-sf010.pdf [file mbio.03239-21-sf010.pdf]

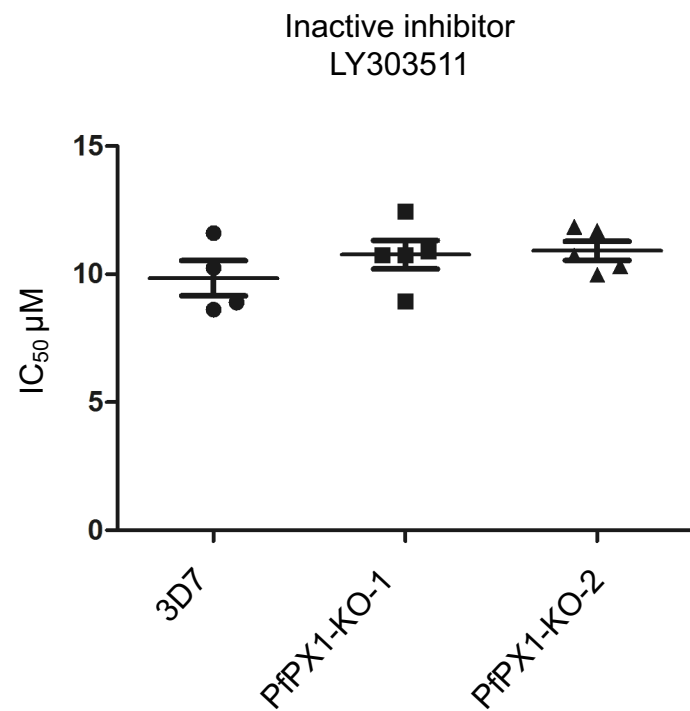

Fig. S10, Related to Fig. 7A
